# Supplementary material
Source: ML conference proceedings conference paper supplement (https://proceedings.neurips.cc/paper_files/paper/2016/hash/872488f88d1b2db54d55bc8bba2fad1b-Abstract.html)
Supplement: Supplementary file [file 872488f88d1b2db54d55bc8bba2fad1b-Supplemental.zip]

## A Estimator and Algorithm

### A.1 Proof of Proposition 1

**Statement of the Proposition:** The optimization in (2) is jointly convex in  $(X, z)$ . Further,  $\forall \gamma > 0$ ,  $(\lambda, \gamma\epsilon)$  and  $(\gamma^{-1}\lambda, \epsilon)$  lead to equivalent estimators, specifically  $\hat{\mathcal{X}}(\lambda, \gamma\epsilon) = \gamma^{-1}\hat{\mathcal{X}}(\gamma^{-1}\lambda, \epsilon)$ .

**Proof:** Let  $f_{\lambda, \epsilon}(X) = \min_{z \in \mathbb{R}^{|\Omega|}} \lambda \|X\|_* + \frac{1}{2} \|z - \mathcal{P}_\Omega(X)\|_2^2$ .  
s.t.  $\forall j, z_{\Omega_j} \in \mathcal{R}_{\downarrow \epsilon}^{n_j}(y^{(j)})$ ,

We have,

$$\begin{aligned} f_{\lambda, \gamma\epsilon}(X) &= \min_z \lambda \|X\|_* + \frac{1}{2} \|z - \mathcal{P}_\Omega(X)\|_2^2 \text{ s.t. } z_{\Omega_j} \in \mathcal{R}_{\downarrow \gamma\epsilon}^{n_j}(y^{(j)}), \\ &\stackrel{(a)}{=} \min_{\bar{z}} \lambda \|X\|_* + \frac{1}{2} \|\gamma \bar{z} - \mathcal{P}_\Omega(X)\|_2^2 \text{ s.t. } \bar{z}_{\Omega_j} \in \mathcal{R}_{\downarrow \epsilon}^{n_j}(y^{(j)}), \\ &= \gamma^2 \min_{\bar{z}} \frac{\lambda}{\gamma} \|X/\gamma\|_* + \frac{1}{2} \|\bar{z} - \mathcal{P}_\Omega(X/\gamma)\|_2^2 \text{ s.t. } \bar{z}_{\Omega_j} \in \mathcal{R}_{\downarrow \epsilon}^{n_j}(y^{(j)}), \\ &= \gamma^2 f_{\gamma^{-1}\lambda, \epsilon}(X/\gamma), \end{aligned} \tag{9}$$

where (a) follows from reparameterizing the optimization using  $\bar{z} = z/\gamma$  as the geometry of  $\mathcal{R}_{\downarrow \gamma\epsilon}^{n_j}(y^{(j)})$  which is set of linear constraints of the form  $z_i - z_k \leq \gamma\epsilon$ . From above set of equations, if  $X \in \underset{X}{\text{Argmin}} f_{\lambda, \gamma\epsilon}(X)$ , then  $\gamma^{-1}X \in \underset{X}{\text{Argmin}} f_{\gamma^{-1}\lambda, \epsilon}(X)$ .

### A.2 Proof of Lemma 2

**Statement of the Lemma:** Consider the following steps,

$$\begin{aligned} \text{Step 1. } \pi^*(x) \text{ s.t. } \forall k \in [K], \pi^*(x)_{P_k} &= \text{sort}(x_{P_k}) \\ \text{Step 2. } \hat{z} &= \text{PAV}(\pi^*(x) - \epsilon \mathbf{d}^{\text{bl}}) + \epsilon \mathbf{d}^{\text{bl}}. \end{aligned} \tag{10}$$

Estimate  $\hat{z}$  is the unique minimizer for

$$\underset{z}{\text{argmin}} \|z - x\|_2^2 \text{ s.t. } \exists \pi \in \Pi_P : \mathbf{D}_n \pi(z) \leq \epsilon \mathbf{D}_n \mathbf{d}^{\text{bl}}.$$

**Proof:** A version of the lemma for linear orders was proved in [2]. In general,

$$\begin{aligned} &\min_z \|z - x\|_2^2 \text{ s.t. } \exists \pi \in \Pi_P : \mathbf{D}_n \pi(z) \leq \epsilon \mathbf{D}_n \mathbf{d}^{\text{bl}} \\ &= \min_{z, \pi \in \Pi_P} \|z - x\|_2^2 \text{ s.t. } \mathbf{D}_n \pi(z) \leq \epsilon \mathbf{D}_n \mathbf{d}^{\text{bl}} \\ &\stackrel{(a)}{=} \min_w \min_{\pi \in \Pi_P} \|\pi^{-1}(w + \epsilon \mathbf{d}^{\text{bl}}) - x\|_2^2 \text{ s.t. } \mathbf{D}_n w \\ &\leq 0 \stackrel{(b)}{=} \min_{w: \mathbf{D}_n w \leq 0} \min_{\pi \in \Pi_P} \|w + \epsilon \mathbf{d}^{\text{bl}} - \pi(x)\|_2^2 \\ &\stackrel{(c)}{=} \min_{w: \mathbf{D}_n w \leq 0} \|w + \epsilon \mathbf{d}^{\text{bl}} - \pi^*(x)\|_2^2, \end{aligned} \tag{11}$$

where  $\pi^*(x)$  is the update from Step 1 stated above, (a) follows reparametrizing  $w := \pi(z) - \epsilon \mathbf{d}^{\text{bl}}$ , (b) follows as for all permutations  $\pi$  using  $\|x\|_2^2 = \|\pi(x)\|_2^2$ , and (c) follows from Proposition 5 as  $\mathbf{D}_n w \leq 0$  from constraints and  $\epsilon \mathbf{D}_n \mathbf{d}^{\text{bl}} \leq 0$  by construction. The final minimization is solved using Step 2.  $\square$

**Proposition 5** For any sorted  $z \in \mathbb{R}^n$  such  $\mathbf{D}_n z \leq 0$ ,  $\pi^* = \underset{\pi \in \Pi_P}{\text{argmin}} \|z - \pi(x)\|_2^2$ , where  $\pi^*$  is the permutation from Step 1.

$\Pi_P$  allows for all possible permutations within each partition  $P_k$ . Proposition follows from optimality of sorting within each block.  $\square$

## B Generalization Error

### B.1 Background

**Definition 5 (Rademacher Complexity)** Let  $X_1, X_2, \dots, X_n \in \mathcal{X}$  be drawn iid from a distribution  $\mathbb{P}_X$ . For a function class  $\mathcal{F} : \mathcal{X} \rightarrow \mathcal{A}$ , the empirical Rademacher complexity is defined as,

$$\hat{\mathfrak{R}}_n(\mathcal{F}) = \mathbb{E}_\sigma \sup_{f \in \mathcal{F}} \left( \frac{1}{n} \sum_{i=1}^n \sigma_i f(X_i) \right),$$

where  $\sigma_1, \sigma_2, \dots, \sigma_n$  are iid Rademacher variables, i.e.,  $\pm 1$  with probability  $1/2$ .

The Rademacher complexity with respect to  $\mathbb{P}_X$  is then defined as  $\mathfrak{R}_n(\mathcal{F}) = \mathbb{E}_{\mathbb{P}_X} \hat{\mathfrak{R}}_n(\mathcal{F})$ .

**Theorem 6 (Generalization Error Bound (Corollary 15 in [3]))** Consider a loss function  $\ell : \mathcal{Y} \times \mathbb{R}^m \rightarrow [0, 1]$  and a bounded function class  $\mathcal{F} : \mathcal{X} \rightarrow \mathbb{R}^m$  such that  $\mathcal{F}$  is a direct sum of  $\mathcal{F}_1, \mathcal{F}_2, \dots, \mathcal{F}_m$ . Further, if  $\ell$  is  $L$ -Lipschitz continuous with respect to Euclidean distance on  $\mathbb{R}^m$  and is uniformly bounded. Let  $\{(X_i, Y_i), i = 1, 2, \dots, n\}$  be sampled from a distribution  $\mathbb{P}_{X,Y}$ . Then there exists a constant  $c$  such that, for any integer  $n$  and any  $\delta \in (0, 1)$ , with probability at least  $1 - \delta$ , over all sample of length  $n$ , the following holds for every  $f \in \mathcal{F}$ :

$$\mathbb{E}_{X,Y} \ell(Y, f(X)) \leq \frac{1}{n} \sum_{i=1}^n \ell(Y_i, f(X_i)) + cL \sum_{i=1}^m \hat{\mathfrak{R}}_n(\mathcal{F}_m) + \sqrt{\frac{8 \log(2/\delta)}{n}}$$

### B.2 Proof of Theorem 4

**Lemma 7**  $\phi(\cdot, y)$  is convex and 2-Lipschitz continuous with respect to  $\ell_2$  norm.

**Proof:** Convexity follows from  $\Phi$  being a marginal of a convex function. For a any convex set  $C$  and its projection operator  $P_C$ , we have the following for all  $x, x'$ :

$$\begin{aligned} \|\|x - P_C(x)\|_2 - \|x' - P_C(x')\|_2\| &\leq \|x - P_C(x) - x' + P_C(x')\|_2 \\ &\leq \|x - x'\|_2 + \|P_C(x) - P_C(x')\|_2 \leq 2\|x - x'\|_2 \end{aligned}$$

Consider a vector class of functions in  $\mathbb{R}^R$ ,  $\mathcal{F}_R = \{\Omega(s) \rightarrow X_{\Omega(s)} \in \mathbb{R}^R : \|X\|_* \leq M\}$ , where  $\Omega(s)$  are sampled as in the main paper. Also, consider another function classes  $\mathcal{F}_{ij} = \{(i, j) \rightarrow X_{ij} : \|X\|_* \leq M\}$ . It can be seen that  $\mathcal{F}_R$  is an  $R$  way direct sum of  $\mathcal{F}_{ij}$ . In order to use Theorem 6, we need to estimate the Rademacher complexity of  $\mathcal{F}_{ij}$ .

**Lemma 8** Let  $\Omega = \cup_j \Omega_j$  obtained from combining samples from Assumption 1. The distribution of  $\Omega$  is equivalent to uniformly sampling with replacement  $|\Omega| = c_0 d_2 R \log d_2$  entries from  $[d_1] \times [d_2]$ .

**Proof:** For  $k = 1, 2 \dots |\Omega|$ ,  $\forall (i, j) \in [d_1] \times [d_2]$ ,  
 $\mathbb{P}((i, j) = \Omega_k) = \frac{1}{d_1 d_2}$ .

Thus, given  $(i, j) \in [d_1] \times [d_2]$ ,  $\mathbb{P}((i, j) \in \Omega) = \frac{|\Omega|}{d_1 d_2}$ . □

**Lemma 9 (Theorem 29 in [31])** For a universal constant  $K$ , the Rademacher complexity of matrices in  $\mathbb{R}^{d_1 \times d_2}$  of trace norm  $M$ , over uniform sampling of index pairs  $\Omega$  is bounded by the following whenever  $|\Omega| > d \log d$

$$\mathfrak{R}(\{\|X\|_* \leq M\}) \leq K \frac{M \log^{1/4} d}{\sqrt{d_1 d_2}} \sqrt{\frac{d \log d}{|\Omega|}} \quad (12)$$

From Lemma 8, it can be seen that Lemma 9 applies to samples drawn according to Assumption 1.

For the function class  $\mathcal{F}_R = \{\Omega(s) \rightarrow X_{\Omega(s)} : \|X\|_* \leq M\}$ , for some  $M$ . The theorem now follows by using the Rademacher complexity bound in Lemma 9 and Lipschitz continuity of  $\Phi(\cdot, y)$  from 7 in Theorem 6.
